# Supplementary material for: In situ study of oxidation states of platinum nanoparticles on a polymer electrolyte fuel cell electrode by near ambient pressure hard X-ray photoelectron spectroscopy
Source: Royal Society of Chemistry journal article supplement (doi:10.1039/c6cp06634h), 2017-01-01
Supplement: c6cp06634h1.pdf [file c6cp06634h1.pdf]

## Supporting Information

### ***In situ* study of oxidation states of platinum nanoparticles on a polymer electrolyte fuel cell electrode by near ambient pressure hard X-ray photoelectron spectroscopy**

Yasumasa Takagi,<sup>\*a,b</sup> Heng Wang,<sup>a‡</sup> Yohei Uemura,<sup>a,b</sup> Takahiro Nakamura,<sup>a</sup> Liwei Yu,<sup>a</sup> Oki Sekizawa,<sup>c</sup> Tomoya Uruga,<sup>c,d</sup> Mizuki Tada,<sup>e</sup> Gabor Samjeskè,<sup>c</sup> Yasuhiro Iwasawa,<sup>c</sup> and Toshihiko Yokoyama<sup>a,b</sup>

<sup>a</sup> Department of Materials Molecular Science, Institute for Molecular Science, Okazaki, Aichi 444-8585, Japan.

<sup>b</sup> SOKENDAI (The Graduate University for Advanced Studies), Okazaki, Aichi 444-8585, Japan.

<sup>c</sup> Innovation Research Center for Fuel Cells, The University of Electro-Communications, Chofu, Tokyo 182-8585, Japan.

<sup>d</sup> Japan Synchrotron Radiation Research Institute, SPring-8, Sayo, Hyogo 679-5198, Japan.

<sup>e</sup> Research Center for Materials Science, Nagoya University, Nagoya, Aichi 464-8602, Japan.

<sup>‡</sup> Present address: School of Material and Chemical Engineering, Zhengzhou University of Light Industry, Zhengzhou Henan Province, 450001, China.

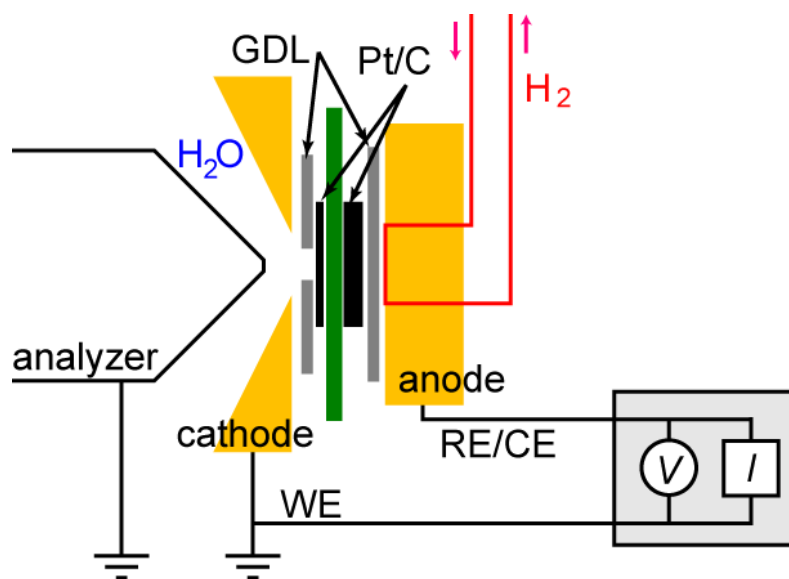

Figure S1: A potentiostatic system of the fuel cell for *in situ* NAP-HAXPES measurements at SPring-8 BL36XU.

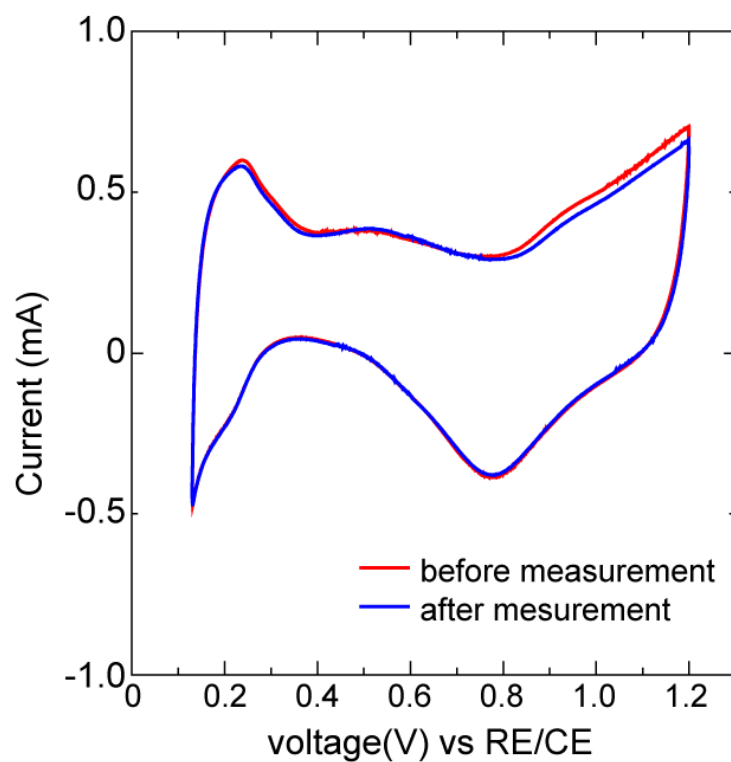

Figure S2: Cyclic voltammograms before and after the *in situ* NAP-HAXPES measurement for 4 hours under water vapor pressure of 4,000 Pa. The scan rate of the CV curves was 20 mV/s. TEC10E50E was used as the catalyst in the electrode.
